# Supplementary material for: Blood Flow Deficits and Cerebrovascular Changes in a Dietary Model of Hyperhomocysteinemia
Source: PubMed Central journal article supplement — ASN Neuro. 2019 Jul 30;11:1759091419865788. doi: 10.1177/1759091419865788 (PMC6668175; doi:10.1177/1759091419865788), 2019-07-30
Supplement: Supplemental_Material2.pdf [file Supplemental_Material2.pdf]

## Formula

g/Kg

|                                                         |         |
|---------------------------------------------------------|---------|
| Casein, "Vitamin-Free" Test                             | 195.0   |
| DL-Methionine                                           | 7.7     |
| Sucrose                                                 | 345.567 |
| Corn Starch                                             | 300.0   |
| Soybean Oil                                             | 70.0    |
| Cellulose                                               | 40.0    |
| Mineral Mix, AIN-93G-MX (94046)                         | 35.0    |
| Calcium Phosphate, dibasic                              | 4.0     |
| TBHQ, antioxidant                                       | 0.014   |
| Choline Bitartrate                                      | 2.5     |
| Niacin                                                  | 0.03    |
| Calcium Pantothenate                                    | 0.016   |
| Thiamin (81%)                                           | 0.006   |
| Riboflavin                                              | 0.006   |
| Biotin                                                  | 0.0002  |
| Vitamin E, DL-alpha tocopheryl acetate (500 IU/g)       | 0.15    |
| Vitamin A Palmitate (500,000 IU/g)                      | 0.008   |
| Vitamin D <sub>3</sub> , cholecalciferol (500,000 IU/g) | 0.002   |
| Vitamin K <sub>1</sub> , phylloquinone                  | 0.0008  |

## Footnote

A purified diet with approx. 1.2% methionine, and without added folate, vitamin B<sub>6</sub>, and vitamin B<sub>12</sub>. A related diet is TD.00428 which has more typical levels of methionine.

Selected Nutrient Information<sup>1</sup>

|              | % by weight | % kcal from |
|--------------|-------------|-------------|
| Protein      | 18.3        | 19.0        |
| Carbohydrate | 62.3        | 64.7        |
| Fat          | 7.0         | 16.3        |
| Kcal/g       | 3.9         |             |

<sup>1</sup> Values are calculated from ingredient analysis or manufacturer data

## Speak With A Nutritionist

- + (800) 483-5523
- + askanutritionist@envigo.com

Teklad diets are designed & manufactured for research purposes only.

## Key Features

- + Purified Diet
- + Higher Methionine
- + Methyl Metabolism
- + Rodent

## Key Planning Information

- + Products are made fresh to order
- + Store product at 4°C or lower
- + Use within 6 months (applicable to most diets)
- + Box labeled with product name, manufacturing date, and lot number
- + Replace diet at minimum once per week  
*More frequent replacement may be advised*
- + Lead time:
  - 2 weeks non-irradiated
  - 4 weeks irradiated

## Product Specific Information

- + 1/2" Pellet or Powder (free flowing)
- + Minimum order 3 Kg
- + Irradiation not advised
  - Contact a nutritionist for recommendations

## Options (fees will apply)

- + Rush order (pending availability)
- + Irradiation (see Product Specific Information)
- + Vacuum packaging (1 and 2 Kg)

## Contact Us

Obtain pricing · Check order status  
+ teklad@envigo.com  
+ (800) 483-5523

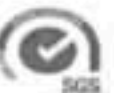

## International Inquiry (outside USA or Canada)

- + askanutritionist@envigo.com

## Place Your Order (USA &amp; Canada)

- Please Choose One
- + www.envigo.com/teklad-orders
  - + tekladorders@envigo.com
  - + (800) 483-5523
  - + (608) 277-2066 facsimile
